# Supplementary material for: Enhanced optical anisotropy of six-coordinated silica polymorphs via high-pressure hydrothermal treatment
Source: Royal Society of Chemistry journal article supplement (doi:10.1039/d4tc03456b), 2024-11-15
Supplement: d4tc03456b1.pdf [file d4tc03456b1.pdf]

1 Supporting Information

2 **Enhanced optical anisotropy of six-coordinated silica polymorphs via**  
3 **high-pressure hydrothermal treatment**

4 Junwei Li<sup>1</sup>, Yanqiang Li<sup>2</sup>, Weiqi Huang<sup>2</sup>, Takayuki Ishii<sup>3</sup>, Yanhao Lin<sup>4</sup>, Binbin  
5 Yue<sup>4</sup>, Sangen Zhao<sup>2\*</sup>, Qingyang Hu<sup>1,4\*</sup>

6

7 <sup>1</sup> CAS Center for Excellence in Deep Earth Science, Guangzhou Institute of  
8 Geochemistry, Chinese Academy of Sciences, Guangzhou 510640, China.

9 <sup>2</sup> State Key Laboratory of Structural Chemistry, Fujian Institute of Research on the  
10 Structure of Matter, Chinese Academy of Sciences, Fuzhou, Fujian 350002, China.

11 <sup>3</sup> Institute for Study of the Earth's Interior, Okayama University, Misasa, Tottori  
12 682-0193, Japan.

13 <sup>4</sup> Center for High Pressure Science and Technology Advanced Research  
14 (HPSTAR), Beijing 100193, China.

15

16 \* To whom correspondence should be addressed, Email: zhaosangen@fjirsm.ac.cn;  
17 qingyang.hu@hpstar.ac.cn

18

19

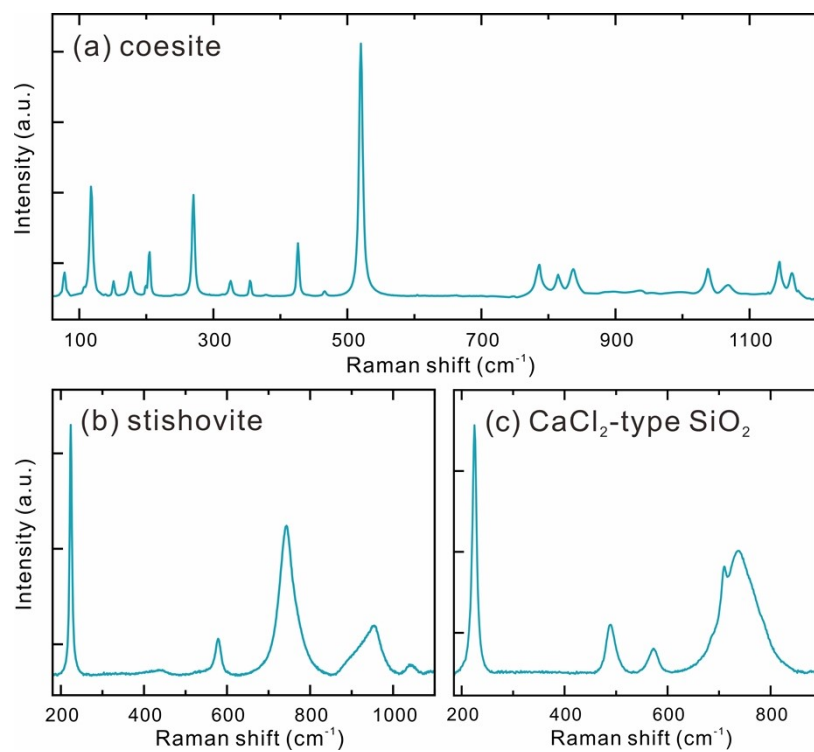

20

21 **Figure S1.** Raman spectra of coesite (a), stishovite (b) and CaCl<sub>2</sub>-type SiO<sub>2</sub> (c) single  
22 crystals at ambient conditions.

23

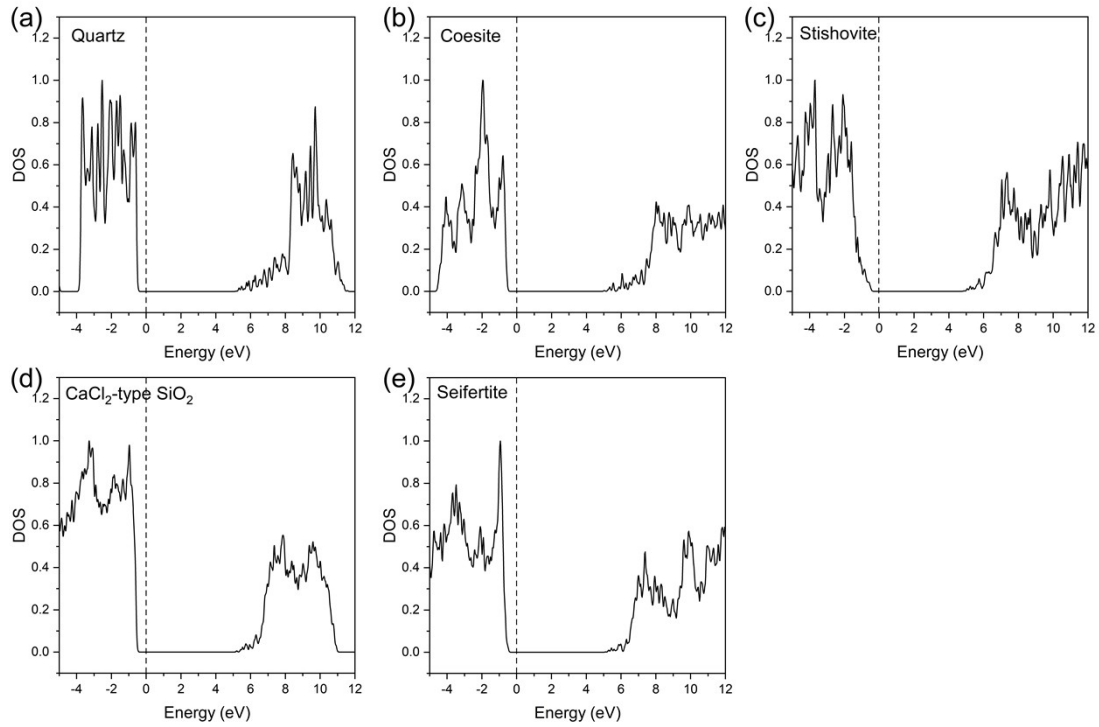

24

25 **Figure S2.** DOS of quartz (a), coesite (b), stishovite (c), CaCl<sub>2</sub>-type SiO<sub>2</sub> (d) and  
 26 seifertite (e) at 1 atmosphere and static conditions. The structure of CaCl<sub>2</sub>-type SiO<sub>2</sub> is  
 27 obtained from a previous study and free of Al.

28

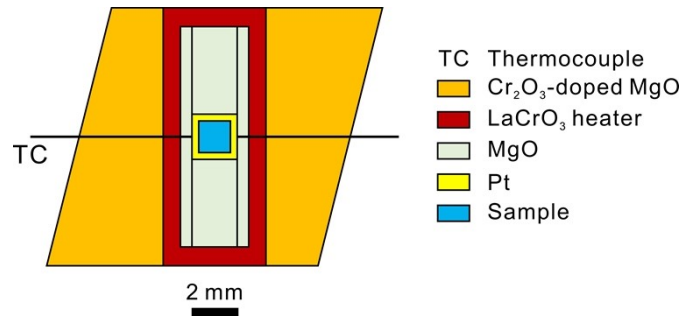

29

30 **Figure S3.** Schematic drawing of the cell assembly used for synthesizing coesite in this  
31 study. The cell assembly used for synthesizing stishovite is similar, but with smaller  
32 size.

33

34 **Table S1.** Chemical compositions of recovered products determined by electron probe  
35 microanalysis.

| Phase                          | SiO <sub>2</sub> (wt %) | Al <sub>2</sub> O <sub>3</sub> (wt %) | Total (wt %) |
|--------------------------------|-------------------------|---------------------------------------|--------------|
| Coesite                        | 99.03(42)               | 0.21(13)                              | 99.23(58)    |
| Stishovite                     | 98.19(35)               | 0.30(11)                              | 98.51(47)    |
| CaCl <sub>2</sub> -type silica | 89.29(68)               | 8.90(16)                              | 98.20(70)    |

36

37 **Table S2.** Crystal data and structure refinements for coesite, stishovite and CaCl<sub>2</sub>-type silica.

| Phase                                               | Coesite                                                         | Stishovite                                                      | CaCl <sub>2</sub> -type silica                                |
|-----------------------------------------------------|-----------------------------------------------------------------|-----------------------------------------------------------------|---------------------------------------------------------------|
| Synthesis conditions                                | 9 GPa, 1000 °C                                                  | 23 GPa, 1600 °C                                                 | 24 GPa, 1900 °C                                               |
| Water content                                       | 200 ppm                                                         | 0.62(15) wt %                                                   | 1.08(5) wt %                                                  |
| Crystal system                                      | Monoclinic                                                      | Tetragonal                                                      | Orthorhombic                                                  |
| Space group                                         | <i>C2/c</i>                                                     | <i>P4<sub>2</sub>/mnm</i>                                       | <i>Pnnm</i>                                                   |
| <i>a</i> (Å)                                        | 7.141(2)                                                        | 4.1998(3)                                                       | 4.2573(7)                                                     |
| <i>b</i> (Å)                                        | 12.383(4)                                                       | 4.1998(3)                                                       | 4.1844(7)                                                     |
| <i>c</i> (Å)                                        | 7.118(2)                                                        | 2.6741(3)                                                       | 2.6828(10)                                                    |
| $\alpha$ (°)                                        | 90                                                              | 90                                                              | 90                                                            |
| $\beta$ (°)                                         | 119.553(9)                                                      | 90                                                              | 90                                                            |
| $\gamma$ (°)                                        | 90                                                              | 90                                                              | 90                                                            |
| <i>V</i> (Å <sup>3</sup> )                          | 547.5(3)                                                        | 47.167(9)                                                       | 44.79(2)                                                      |
| <i>Z</i>                                            | 16                                                              | 2                                                               | 2                                                             |
| Temperature (K)                                     | 296(2)                                                          | 296(2)                                                          | 293(2)                                                        |
| <i>F</i> (000)                                      | 240                                                             | 60                                                              | 60                                                            |
| $\theta_{\max}$ (°)                                 | 22.150                                                          | 32.836                                                          | 40.327                                                        |
| Index ranges                                        | -7 ≤ <i>h</i> ≤ 6; -12 ≤ <i>k</i> ≤ 13; -7 ≤ <i>l</i> ≤ 6       | -3 ≤ <i>h</i> ≤ 5; -5 ≤ <i>k</i> ≤ 5; -3 ≤ <i>l</i> ≤ 4         | -7 ≤ <i>h</i> ≤ 7; -7 ≤ <i>k</i> ≤ 7; -3 ≤ <i>l</i> ≤ 4       |
| Reflections collected                               | 864                                                             | 256                                                             | 928                                                           |
| Independent reflections/<br><i>R</i> <sub>int</sub> | 224 / 0.0494                                                    | 49 / 0.0122                                                     | 169 / 0.0309                                                  |
| Number of parameters                                | 24                                                              | 8                                                               | 11                                                            |
| Goodness of fit on <i>F</i> <sup>2</sup>            | 1.181                                                           | 1.249                                                           | 1.185                                                         |
| Final <i>R</i> indices [ <i>I</i> > 2σ( <i>I</i> )] | <i>R</i> <sub>1</sub> = 0.0437, <i>wR</i> <sub>2</sub> = 0.1024 | <i>R</i> <sub>1</sub> = 0.0254, <i>wR</i> <sub>2</sub> = 0.0680 | <i>R</i> <sub>1</sub> = 0.0344                                |
| <i>R</i> indices (all data)                         | <i>R</i> <sub>1</sub> = 0.0770, <i>wR</i> <sub>2</sub> = 0.1224 | <i>R</i> <sub>1</sub> = 0.0268, <i>wR</i> <sub>2</sub> = 0.0695 | <i>R</i> <sub>1</sub> = 0.0339, <i>wR</i> <sub>2</sub> = 0.09 |
